# Supplementary material
Source: HighWire-hosted journal article supplement (http://www.cmaj.ca/highwire/filestream/59411/field_highwire_adjunct_files/1/150430-res-2-at.pdf)
Supplement: 150430-res-2-at.pdf [file 150430-res-2-at.pdf]

## Appendix 2 (as supplied by the authors): Summary and rationale for small and large treatment effects

| Approach                                              | Small effect                       | Large effect                        |
|-------------------------------------------------------|------------------------------------|-------------------------------------|
| Standardized Mean Difference                          | 0.20                               | 0.80                                |
| Mean Difference in minimal important difference units | 0.60                               | 2.00                                |
| Mean Difference in natural units                      | 0.60 point reduction               | 2.00 point reduction                |
| Ratio of Means                                        | 0.92, 8% less                      | 0.63, 37% less                      |
| Relative Risk                                         | 0.80 (80%), 20% RRR                | 0.50 (50%), 50% RRR                 |
| Risk Difference                                       | 0.04 (4%), 4 per 100 fewer, NNT=25 | 0.20 (20%), 20 per 100 fewer, NNT=5 |

Answers are based on consensus among the group of investigators. We used the following empirical data and guidelines to justify small and large treatment effects.

**Standardized Mean Difference (SMD):** as a rule of thumb, 0.2 SD represents a small difference, and 0.8 represents a large effect (1). Cohen proposed these values on theoretical grounds, which have subsequently become accepted.

**Minimal Importance Difference (MID) units:** a consensus statement suggests that a 1 point change on a 10 point pain scale constitutes an MID (2). We have previously published guidelines indicating that half (0.5) the MID is a small treatment effect (3). Reporting results in MID units risks naïve misinterpretation. For example, some may be under the impression that for estimates above 1 MID, the treatment has important benefits for all patients, and estimates below 1 for none. Even if the pooled estimate lies between 0 and 1 (or 0 and -1), treatment may have an important impact on many patients (4). We suggest the following guide for interpretation: if the pooled estimate is greater than 1 MID unit, many patients are likely to gain important benefits from treatment. If the estimate of effect lies between 0.5 and 1 MID unit, the treatment may benefit an appreciable number of patients. As the pooled estimate falls below 0.5 MID units it becomes progressively less likely that an appreciable numbers of patients will achieve important benefits from treatment (3,5).

**Mean Difference (MD)** in natural units: Please see above.

**Ratio of Means (RoM):** our estimates were based on Cohen's proposed values, with SMDs of 0.2, and 0.8 corresponding to increases in RoM of approximately 8% and 37%, respectively. This is based on work correlating the SMD to the RoM using 232 meta-analyses that included at least 5 trials and that reported continuous outcomes (6).

**Relative Risk (RR)** estimates are based on published guidelines on the interpretation of these measures of treatment effect (7).

**Risk Difference (RD)** estimates are based on published guidelines on the interpretation of these measures of treatment effect (8,9).

### References

1. Cohen J. Statistical power analysis for the behavioral sciences. 2nd edition. Hillside, NJ: Lawrence Erlbaum Associates; 1988. pp. 24-7.
2. Dworkin RH, Turk DC, Wyrwich KH, et al. Interpreting the clinical importance of treatment outcomes in chronic pain clinical trials: IMMPACT recommendations. *Journal of Pain* 2009;9:105-21.
3. Johnston BC, et al. Improving the interpretation of quality of life evidence in meta-analyses: the application of minimal important difference units. *Health Qual Life Outcomes* 2010 Oct 11;8:116.
4. Guyatt GH, et al. Interpreting treatment effects in randomised trials. *BMJ* 1998, 316:690-3.
5. Johnston BC, et al. Patient-reported outcomes in meta-analyses-part 2: methods for improving interpretability for decision-makers. *Health Qual Life Outcomes* 2013 Dec 21;11:211.
6. Friedrich JO, et al. Ratio of means for analyzing continuous outcomes in meta-analysis performed as well as mean difference methods. *J Clin Epidemiol.* 2011;64(5):556-64.
7. Guyatt GH, et al. GRADE Working Group. GRADE guidelines: 9. Rating up the quality of evidence. *J Clin Epidemiol.* 2011 Dec;64(12):1311-6.
8. Guyatt GH, et al. Part B, Therapy; Chapter 8. Confidence Intervals. In: Guyatt G, Rennie D, Meade M, Cook D. *Users' Guides to the Medical Literature: A Manual for Evidence-Based Clinical Practice*, Second Edition. McGraw-Hill Professional, 2008.
9. Jaeschke R, et al. Part B, Therapy; Chapter 7. Does Treatment Lower Risk? Understanding the Results. In: Guyatt G, Rennie D, Meade M, Cook D. *Users' Guides to the Medical Literature: A Manual for Evidence-Based Clinical Practice*, Second Edition. McGraw-Hill Professional, 2008.

Appendix to: Johnston BC, Alonso-Coello P, Friedrich JO, et al. Communicating the magnitude of treatment effects: a randomized survey of clinicians across 8 countries. *CMAJ* 2015. DOI: 10.1503/cmaj.150430.

Copyright © 2016 The Author(s) or their employer(s).  
To receive this resource in an accessible format, please contact us at [cmajgroup@cmaj.ca](mailto:cmajgroup@cmaj.ca).
